# Supplementary material for: Harnessing gradient gelatin nanocomposite hydrogels: a progressive approach to tackling antibacterial biofilms
Source: Royal Society of Chemistry journal article supplement (doi:10.1039/d3ra06034a), 2023-01-01
Supplement: d3ra06034a1.pdf [file d3ra06034a1.pdf]

Supporting Information for:

## Harnessing gradient gelatin nanocomposite hydrogels: a progressive approach to tackling antibacterial biofilms

Jiawei Zhu,<sup>a</sup> Anli Wang,<sup>a</sup> Xingguo Miao,<sup>a</sup> Hui Ye,<sup>a</sup> Shuo Pan,<sup>d</sup> Chengxi Zhang,<sup>e</sup> Qiuping Qian,<sup>\*a,b,c</sup> and Feifei Su<sup>\*a</sup>

<sup>a</sup>Infectious Disease Department, Wenzhou Central Hospital, Wenzhou 325099, Zhejiang, People's Republic of China. Email: feifeisuzs@163.com

<sup>b</sup>Zhejiang Engineering Research Center for Tissue Repair Materials, Wenzhou Institute, University of Chinese Academy of Sciences, Wenzhou 325000, Zhejiang, People's Republic of China. Email: qianqp@ucas.ac.cn

<sup>c</sup>Departamento de Química Física and Biomedical Research Center (CINBIO), Universidade de Vigo, 36310, Vigo, Spain

<sup>d</sup>Wenzhou Medical University, Wenzhou 325000, Zhejiang, People's Republic of China.

<sup>e</sup>School of Materials Science and Engineering, Shandong Jianzhu University, Jinan 250101, China.

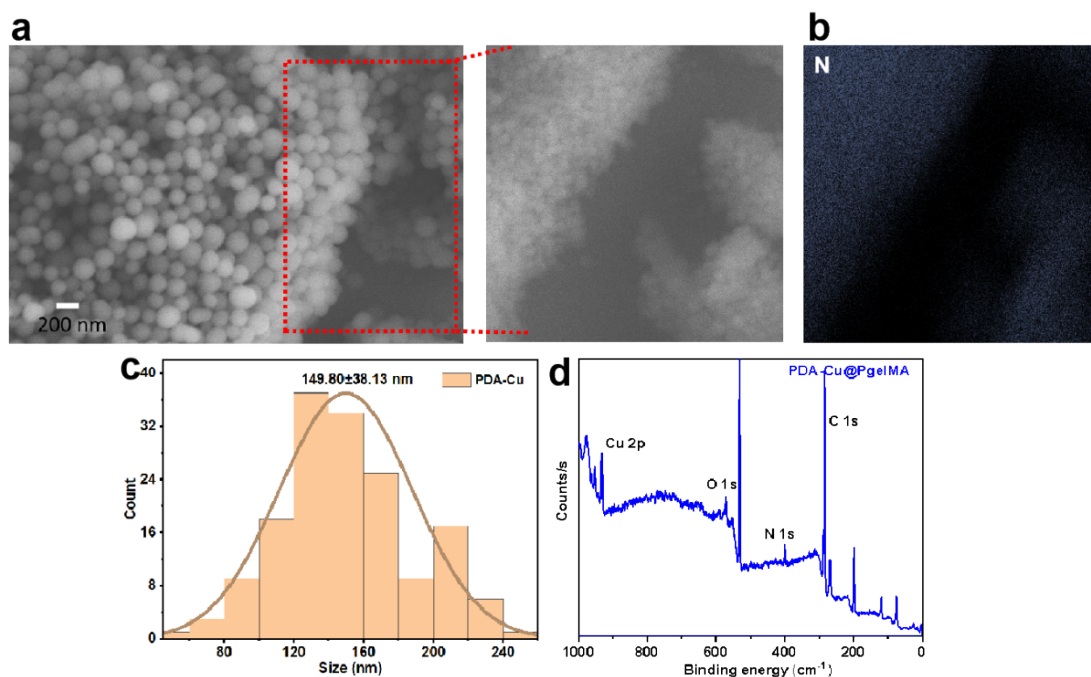

Fig.S1 SEM and element mapping images of PDA-Cu nanoparticles (a and b). Image J analysis of the size of PDA-Cu (c). Full scan XPS survey spectrum and the high-resolution spectra of PDA-Cu@PgelMA (d).

|                 |            |             |                  |                   |                |
|-----------------|------------|-------------|------------------|-------------------|----------------|
| Hydrogel groups | GelMA (5%) | GelMA (10%) | PDA-Cu (1 mg/mL) | PDA-Cu (10 mg/mL) | LAP (20 mg/mL) |
| 1-PgelMA-5%     | √          |             |                  |                   | √              |

|                                       |   |   |   |
|---------------------------------------|---|---|---|
| 2-PgelMA-10%                          | ✓ |   | ✓ |
| 3-PDA-Cu@PgelMA-01                    | ✓ | ✓ | ✓ |
| 3-PDA-Cu@PgelMA-02                    | ✓ |   | ✓ |
| 4-PGelMA-T(top)/PDA-Cu@PGelMA-D(down) | ✓ |   | ✓ |
| 5-PDA-Cu@PDA-Cu@PGelMA-T/PGelMA-D     | ✓ |   | ✓ |

Table S1. hydrogel groups.

|                                      |           |          |
|--------------------------------------|-----------|----------|
| Sample quality                       | MO (g)    | 0.0254   |
| Test solution element coencentration | Cu (mg/L) | Cu       |
| Sample elemental content (%)         |           | 0.061867 |

Table S2. ICP-MS analysis of PDA-Cu.

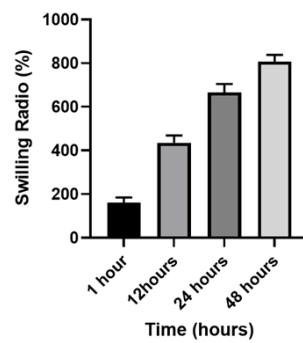

Fig.S2 The hygroscopicity of gradient gelatin nanocomposite hydrogel (n = 3)

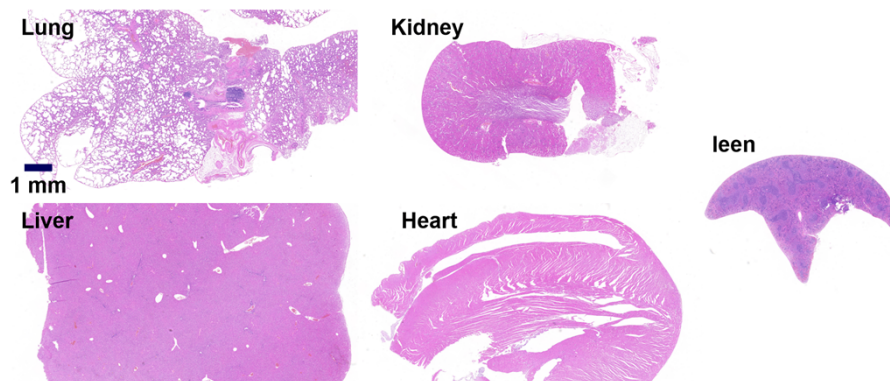

Fig.S3 Microscopy images of hematoxylin and eosin (H&E) stained sections of major organs of rats after 7 days of subcutaneous implantation of gradient gel.

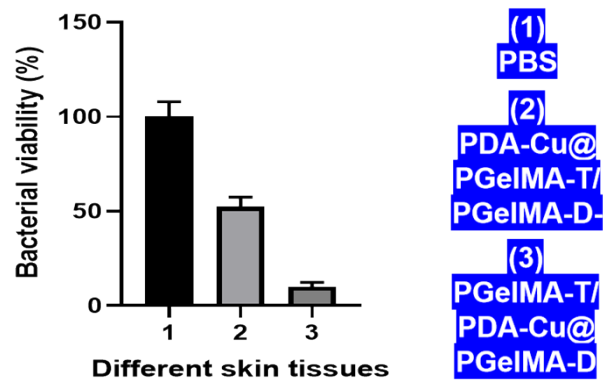

Fig.S4 Evaluation of bacterial colonies inside the infected skin after 6 d treatment (n = 3).

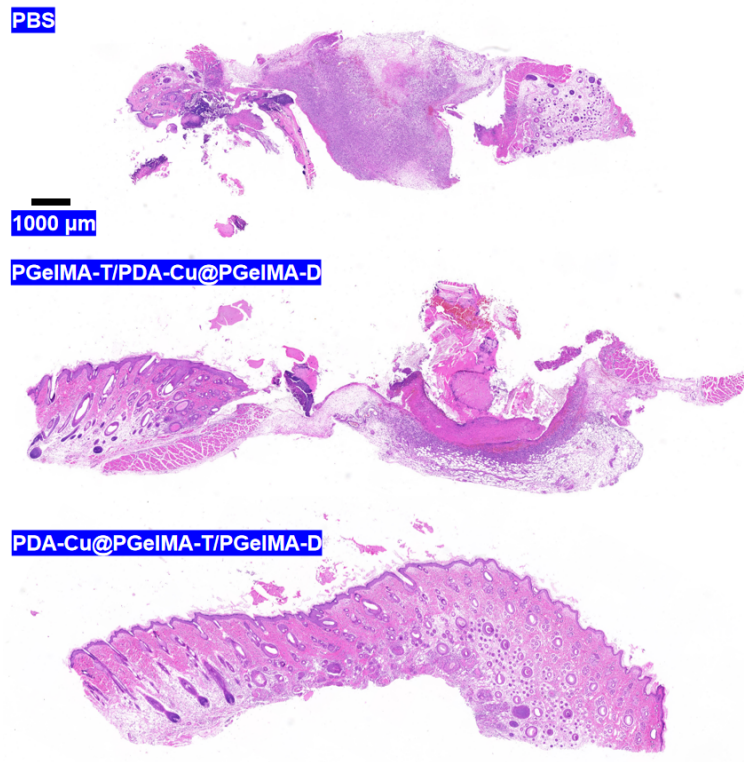

Fig.S5 Microscopy images of hematoxylin and eosin (H&E) stained sections of wound tissues.

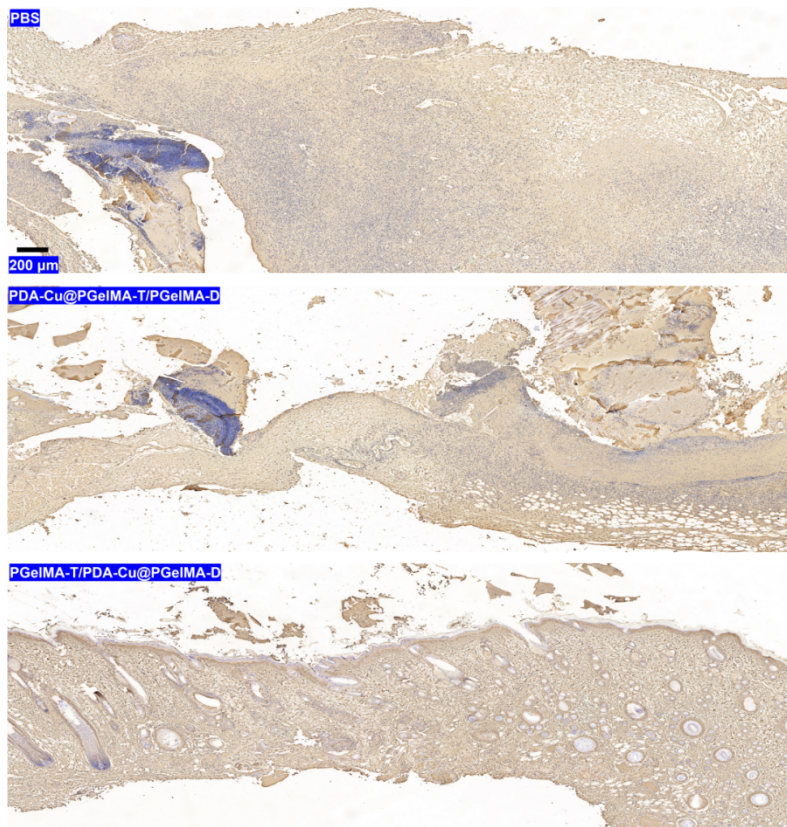

Fig.S6 Infected skin wound tissue evaluated by IHC of IL-6 a after treatment.
